# Supplementary material for: Uropathogenic Escherichia coli Superinfection Enhances the Severity of Mouse Bladder Infection
Source: PubMed Central journal article supplement (PMC4287616; doi:10.1371/journal.ppat.1004599), 2015-01-08
Supplement: ppat.1004599.s002.pdf [file ppat.1004599.s002.pdf]

| C57BL6           |                                  |                              | C3H/HeN          |                                  |                              |
|------------------|----------------------------------|------------------------------|------------------|----------------------------------|------------------------------|
| Gene name        | Fold change (chronic v resolved) | Functional Annotation        | Gene name        | Fold change (chronic v resolved) | Functional Annotation        |
| <b>Ubd</b>       | <b>119.405</b>                   | <b>Proteosome</b>            | BC100530         | 144.401                          | Unknown                      |
| <b>Saa3</b>      | <b>112.203</b>                   | <b>Inflammatory Response</b> | <b>S100a8</b>    | <b>88.7327</b>                   | <b>Cytokine/Ion Binding</b>  |
| <b>S100a8</b>    | <b>85.4193</b>                   | <b>Cytokine/ Ion Binding</b> | <b>Mmp7</b>      | <b>87.0008</b>                   | <b>Ion Binding</b>           |
| <b>Mmp7</b>      | <b>77.6183</b>                   | <b>Ion Binding</b>           | <b>Ubd</b>       | <b>77.6292</b>                   | <b>Proteosome</b>            |
| <b>RegIIIy</b>   | <b>66.2146</b>                   | <b>Inflammatory Response</b> | <b>S100a9</b>    | <b>74.4965</b>                   | <b>Cytokine/ Ion Binding</b> |
| <b>S100a9</b>    | <b>44.9876</b>                   | <b>Cytokine/ Ion Binding</b> | <b>RegIIIy</b>   | <b>62.1077</b>                   | <b>Inflammatory Response</b> |
| Igk-V19-14       | 31.1745                          | Immunoglobulin               | <b>Cxcl2</b>     | <b>39.3707</b>                   | <b>Cytokine</b>              |
| Igk-V28          | 27.7003                          | Immunoglobulin               | Il1b             | 38.9361                          | Cytokine                     |
| <b>Fam3b</b>     | <b>25.7301</b>                   | <b>Cytokine</b>              | <b>Sprr2f</b>    | <b>38.7662</b>                   | <b>Tissue Remodeling</b>     |
| Plekhs1          | 24.3332                          | Tissue Remodeling            | <b>Saa3</b>      | <b>36.8235</b>                   | <b>Inflammatory Response</b> |
| Duox2            | 23.492                           | Ion Binding                  | Cxcl5            | 34.2451                          | Cytokine                     |
| Gm5571           | 22.2598                          | Immunoglobulin               | <b>Il1a</b>      | <b>33.0689</b>                   | <b>Cytokine</b>              |
| <b>Sprr2f</b>    | <b>22.0386</b>                   | <b>Tissue Remodeling</b>     | Gabrp            | 31.6717                          | Ion Binding                  |
| AA467197         | 21.9697                          |                              | Sprr2d           | 31.4934                          | Tissue Remodeling            |
| Cxcl9            | 21.46                            | Cytokine                     | <b>Fam3b</b>     | <b>29.3965</b>                   | <b>Cytokine</b>              |
| <b>Cxcl2</b>     | <b>17.698</b>                    | <b>Cytokine</b>              | Cxcr2            | 27.6748                          | Cytokine                     |
| Pigr             | 17.1008                          | Immunoglobulin               | <b>Tmprss11g</b> | <b>26.263</b>                    | <b>Tissue Remodeling</b>     |
| <b>Tmprss11g</b> | <b>15.7865</b>                   | <b>Tissue Remodeling</b>     | Lcn2             | 25.9349                          | Ion Binding                  |
| Nos2             | 15.644                           | Inflammatory Response        | Il1f9            | 24.0818                          | Cytokine                     |
| <b>Il1a</b>      | <b>15.0219</b>                   | <b>Cytokine</b>              | Sprr2g           | 23.4676                          | Tissue Remodeling            |
